# Supplementary material for: Treatment Patterns, Effectiveness, and Safety of Originator Insulin Glargine versus Insulin Glargine-yfgn within the Veterans Health Administration
Source: MDPI journal article supplement (doi:10.3390/pharma3010008), 2024-03-01
Supplement: s1 [file s1]

**Table S1. ICD-10-CM Codes for Hyperglycemia and Hypoglycemia**

| ICD-10-CM Code                       | Description                                                                  |
|--------------------------------------|------------------------------------------------------------------------------|
| <b>Hyperglycemia<sup>15,16</sup></b> |                                                                              |
| R73.9                                | Hyperglycemia, unspecified                                                   |
| E10.65                               | Type 1 diabetes mellitus with hyperglycemia                                  |
| E11.65                               | Type 2 diabetes mellitus with hyperglycemia                                  |
| E11.10                               | Type 2 DM with ketoacidosis                                                  |
| E11.11                               | Type 2 DM with ketoacidosis and coma                                         |
| E10.10                               | Type 1 DM with ketoacidosis                                                  |
| E10.11                               | Type 1 DM with ketoacidosis and coma                                         |
| E11.01                               | Type 2 DM with nonketotic hyperglycemic hyperosmolar coma                    |
| E13.01                               | Other specified DM with nonketotic...                                        |
| E13.10                               | Other specified DM with ketoacidosis                                         |
| E13.11                               | Other specified DM with ketoacidosis and coma                                |
| <b>Hypoglycemia<sup>17</sup></b>     |                                                                              |
| E08.641                              | Diabetes mellitus due to underlying condition with hypoglycemia with coma    |
| E11.641                              | Type 2 diabetes mellitus with hypoglycemia with coma                         |
| E11.649                              | Type 2 diabetes mellitus with hypoglycemia without coma                      |
| E13.641                              | Other specified diabetes mellitus with hypoglycemia with coma                |
| E13.649                              | Other specified diabetes mellitus with hypoglycemia without coma             |
| E15                                  | Nondiabetic hypoglycemic coma                                                |
| E16.0                                | Drug-induced hypoglycemia without coma                                       |
| E16.1                                | Other hypoglycemia                                                           |
| E16.2                                | Hypoglycemia, unspecified                                                    |
| E08.649                              | Diabetes mellitus due to underlying condition with hypoglycemia without coma |
| E09.641                              | Drug or chemical induced diabetes mellitus with hypoglycemia with coma       |
| E09.649                              | Drug or chemical induced diabetes mellitus with hypoglycemia without coma    |
| E10.641                              | Type 1 diabetes mellitus with hypoglycemia with coma                         |
| E10.649                              | Type 1 diabetes mellitus with hypoglycemia without coma                      |

ICD-10-CM=International Classification of Diseases, 10th Revision

**Table S2. Baseline Characteristics of Subsample of Patients Receiving Originator Insulin Glargine or Insulin Glargine-yfgn who were Followed for 3+ Months and had HbA1C Measured**

| Characteristic<br>(Total N=177,122)                                        | Prevalent<br>Originator<br>Non-switcher <sup>1</sup><br>N=136,755 (77.2%)<br>n (%) | Originator<br>Switch to<br>Biosimilar <sup>2</sup><br>N=14,538 (8.2%)<br>n (%) | Standardized<br>Difference <sup>3</sup> | Incident<br>Originator<br>Non-switcher <sup>4</sup><br>N=23,966 (13.5%)<br>n (%) | Incident<br>Biosimilar <sup>5</sup><br>N=1,863 (1.1%)<br>n (%) | Standardized<br>Difference <sup>3</sup> |
|----------------------------------------------------------------------------|------------------------------------------------------------------------------------|--------------------------------------------------------------------------------|-----------------------------------------|----------------------------------------------------------------------------------|----------------------------------------------------------------|-----------------------------------------|
| <b>Age (years), mean (SD)</b>                                              | 69.1 (10.3)                                                                        | 69.2 (10.5)                                                                    | 0.0027                                  | 66.0 (12.0)                                                                      | 67.2 (11.8)                                                    | 0.0932                                  |
| 18-64                                                                      | 39,663 (29.0)                                                                      | 4402 (30.3)                                                                    | 0.028                                   | 9978 (41.6)                                                                      | 764 (41.0)                                                     | -0.0127                                 |
| 65-74                                                                      | 62,456 (45.7)                                                                      | 5923 (40.7)                                                                    | -0.0996                                 | 8752 (36.5)                                                                      | 605 (32.5)                                                     | -0.0851                                 |
| 75+                                                                        | 34,636 (25.3)                                                                      | 4213 (29.0)                                                                    | 0.0822                                  | 5236 (21.8)                                                                      | 494 (26.5)                                                     | 0.1092                                  |
| <b>Sex, male</b>                                                           | 130,378 (95.4)                                                                     | 13,676 (94.5)                                                                  | -0.0399                                 | 21,596 (93.7)                                                                    | 1649 (92.1)                                                    | -0.0636                                 |
| <b>Race/Ethnicity</b>                                                      |                                                                                    |                                                                                |                                         |                                                                                  |                                                                |                                         |
| Non-Hispanic White                                                         | 101,513 (74.4)                                                                     | 10,060 (69.4)                                                                  | -0.1119                                 | 16,309 (68.8)                                                                    | 1242 (67.1)                                                    | -0.0295                                 |
| Non-Hispanic Black                                                         | 25,954 (19.0)                                                                      | 3281 (22.6)                                                                    | 0.0886                                  | 5302 (22.4)                                                                      | 417 (22.5)                                                     | 0.0063                                  |
| Hispanic                                                                   | 2989 (2.2)                                                                         | 645 (4.5)                                                                      | 0.1261                                  | 745 (3.1)                                                                        | 95 (5.1)                                                       | 0.1005                                  |
| Other                                                                      | 1560 (1.1)                                                                         | 156 (1.1)                                                                      | -0.0065                                 | 228 (1.0)                                                                        | 25 (1.4)                                                       | 0.0367                                  |
| Asian                                                                      | 1284 (0.9)                                                                         | 79 (0.5)                                                                       | -0.0461                                 | 313 (1.3)                                                                        | 21 (1.1)                                                       | -0.0163                                 |
| American Indian                                                            | 897 (0.7)                                                                          | 71 (0.5)                                                                       | -0.0222                                 | 191 (0.8)                                                                        | 6 (0.3)                                                        | -0.0637                                 |
| Unknown                                                                    | 2194 (1.6)                                                                         | 194 (1.3)                                                                      | -0.0135                                 | 630 (2.7)                                                                        | 45 (2.4)                                                       | -0.0335                                 |
| <b>Marital Status</b>                                                      |                                                                                    |                                                                                |                                         |                                                                                  |                                                                |                                         |
| Married                                                                    | 81,895 (60.1)                                                                      | 9083 (62.6)                                                                    | 0.0532                                  | 13,243 (55.8)                                                                    | 1121 (60.3)                                                    | 0.0996                                  |
| Divorced, separated,<br>or widowed                                         | 42,253 (31.0)                                                                      | 4294 (29.6)                                                                    | -0.0296                                 | 7825 (32.9)                                                                      | 553 (29.8)                                                     | -0.0641                                 |
| Never married                                                              | 12,043 (8.8)                                                                       | 1123 (7.7)                                                                     | -0.0393                                 | 2684 (11.3)                                                                      | 184 (9.9)                                                      | -0.0431                                 |
| <b>Smoking Status</b>                                                      |                                                                                    |                                                                                |                                         |                                                                                  |                                                                |                                         |
| Current smoker                                                             | 23,041 (17.4)                                                                      | 2257 (15.7)                                                                    | -0.0359                                 | 4631 (20.2)                                                                      | 313 (17.3)                                                     | -0.0656                                 |
| Former smoker                                                              | 62,080 (46.9)                                                                      | 6266 (43.7)                                                                    | -0.0462                                 | 9668 (42.2)                                                                      | 769 (42.4)                                                     | 0.0191                                  |
| Never smoker                                                               | 47,374 (35.8)                                                                      | 5816 (40.6)                                                                    | 0.1111                                  | 8620 (37.6)                                                                      | 730 (40.3)                                                     | 0.0664                                  |
| <b>Charlson Comorbidity<br/>Index (adapted),<sup>6</sup> mean<br/>(SD)</b> | 3.1 (1.9)                                                                          | 3.4 (2.0)                                                                      | 0.1408                                  | 2.9 (2.0)                                                                        | 3.2 (2.1)                                                      | 0.1523                                  |
| <b>Other Comorbidities<sup>6</sup></b>                                     |                                                                                    |                                                                                |                                         |                                                                                  |                                                                |                                         |
| Neuropathy                                                                 | 48,900 (35.8)                                                                      | 5702 (39.2)                                                                    | 0.0716                                  | 6685 (27.9)                                                                      | 569 (30.5)                                                     | 0.0583                                  |
| Ischemic stroke                                                            | 3934 (2.9)                                                                         | 442 (3.0)                                                                      | 0.0097                                  | 545 (2.3)                                                                        | 53 (2.8)                                                       | 0.0362                                  |

|                                                                  |                |               |         |                      |                      |         |
|------------------------------------------------------------------|----------------|---------------|---------|----------------------|----------------------|---------|
| Hypertension                                                     | 112,537 (82.3) | 12,491 (85.9) | 0.0994  | 18,346 (76.6)        | 1496 (80.3)          | 0.0913  |
| Retinopathy                                                      | 26,046 (19.0)  | 3299 (22.7)   | 0.0898  | 3274 (13.7)          | 276 (14.8)           | 0.033   |
| Nephropathy                                                      | 37,092 (27.1)  | 4380 (30.1)   | 0.0665  | 5190 (21.7)          | 504 (27.1)           | 0.126   |
| <b>Concomitant Therapies at Index Prescription<sup>7</sup></b>   |                |               |         |                      |                      |         |
| Any non-insulin glargine medication for diabetes                 | 110,069 (80.5) | 12,001 (82.5) | 0.0532  | 18,806 (78.5)        | 1468 (78.8)          | 0.008   |
| Metformin                                                        | 57,981 (42.4)  | 5981 (41.1)   | -0.0255 | 10,652 (44.4)        | 845 (45.4)           | 0.0183  |
| Insulin, fast-acting                                             | 46,584 (34.1)  | 5276 (36.3)   | 0.0467  | 7037 (29.4)          | 596 (32.0)           | 0.057   |
| Sulfonylurea                                                     | 19,724 (14.4)  | 1825 (12.6)   | -0.0548 | 5150 (21.5)          | 409 (22.0)           | 0.0113  |
| Glucagon-like peptide-1 (GLP-1) receptor agonist                 | 21,308 (15.6)  | 2580 (17.7)   | 0.0581  | 2899 (12.1)          | 178 (9.6)            | -0.0819 |
| Thiazolidinedione                                                | 4367 (3.2)     | 450 (3.1)     | -0.0056 | 913 (3.8)            | 84 (4.5)             | 0.035   |
| Meglitinide                                                      | 156 (0.1)      | 8 (0.1)       | -0.0203 | 22 (0.1)             | 1 (0.1)              | -0.0141 |
| Sodium-Glucose Cotransporter 2 (SGLT2) Inhibitor                 | 22,967 (16.8)  | 3713 (25.5)   | 0.2153  | 4584 (19.1)          | 456 (24.5)           | 0.1298  |
| Dipeptidyl Peptidase 4 (DPP-4) Inhibitor                         | 13,684 (10.0)  | 1396 (9.6)    | -0.0136 | 3013 (12.6)          | 240 (12.9)           | 0.0093  |
| Alpha-Glucosidase Inhibitor                                      | 407 (0.3)      | 45 (0.3)      | 0.0022  | 79 (0.3)             | 13 (0.7)             | 0.0515  |
| <b>Number of Concomitant Antidiabetic Medications, mean (SD)</b> | 1.4 (1.0)      | 1.5 (1.0)     | 0.0951  | 1.4 (1.0)            | 1.4 (1.0)            | 0.0045  |
| <b>Glucose Monitoring Sensor, at index date</b>                  | 7677 (5.6)     | 1379 (9.5)    | 0.1469  | 1128 (4.7)           | 93 (5.0)             | 0.0133  |
| <b>Baseline HbA1c (%),<sup>8</sup> mean (SD)</b>                 | 8.6 (2.9)      | 8.2 (1.7)     | -0.182  | 9.5 (2.6)            | 9.4 (2.4)            | -0.0251 |
| <b>Baseline HbA1c &lt;7%<sup>8</sup></b>                         | 27,115 (20.3)  | 3223 (22.3)   | 0.0475  | 2903 (12.7)          | 226 (12.4)           | -0.0084 |
| <b>VHA Hospitalizations and/or ER Visits<sup>6</sup></b>         |                |               |         |                      |                      |         |
| Hypoglycemia                                                     | 65 (0.0)       | 12 (0.1)      | 0.0137  | 9 (0.0) <sup>9</sup> | 1 (0.1) <sup>9</sup> | 0.0076  |
| Hyperglycemia                                                    | 3012 (2.2)     | 422 (2.9)     | 0.0444  | 1491 (6.2)           | 142 (7.6)            | 0.0552  |

SD=standard deviation; HbA1c=glycated hemoglobin; VHA=Veterans Health Administration; ER=emergency room

<sup>1</sup> Index prescription is for the originator product, and patients received the originator within one year prior to the index date. Patients received only the originator product for the duration of the study.

<sup>2</sup> Index prescription is for the biosimilar, and patients received originator insulin glargine within one year prior to the index date. Additional switches could occur after starting the biosimilar.

<sup>3</sup> Standardized difference was calculated as the difference in means or proportions divided by a pooled estimate of the standardized deviation. This measure of the distribution is not influenced by sample sizes and provides a sense of the relative magnitude of the differences. A standardized difference less than 0.1 is considered negligible. Data were missing for sex 0.6%, race/ethnicity 2.1%, marital status 0.5%, smoking status 3.1%, and baseline HbA1c 2.6%.

<sup>4</sup> Index prescription is for the originator product, and patients did not receive the originator within one year prior to the index date. Patients received only the originator product for the duration of the study.

<sup>5</sup> Index prescription is for the biosimilar, and patients did not receive the originator within one year prior to the index date. However, patients could be switched to the originator from the biosimilar product during the study timeframe. Additional switches could also occur after changing to the originator.

<sup>6</sup> Within 12 months prior to index date

<sup>7</sup> Days' supply of concomitant medications overlapped with index prescription date. However, patient may have stopped concomitant medication prior to starting insulin glargine product.

<sup>8</sup> Most recent HbA1c prior to the index prescription date

<sup>9</sup> Results do not provide an accurate estimate due to small numbers (cell count <11)
